# Supplementary material for: Enhanced photocatalytic hydrogen peroxide production activity of imine-linked covalent organic frameworksviamodification with functional groups
Source: Royal Society of Chemistry journal article supplement (doi:10.1039/d2nj03744k), 2022-01-01
Supplement: d2nj03744k1.pdf [file d2nj03744k1.pdf]

**Enhanced photocatalytic hydrogen peroxide production activity of  
imine-linked covalent organic frameworks via modification with  
functional groups**

Yepeng Yang, Juanxue Kang, Yuan Li, Jingjing Liang, Jiaxuan Liang, Liang Jiang<sup>†</sup>,  
Daomei Chen, Jiao He, Yongjuan Chen, and Jiaqiang Wang<sup>†</sup>

*School of Chemical Sciences & Technology, Yunnan Province Engineering Research  
Center of Photocatalytic Treatment of Industrial Wastewater, School of Engineering,  
National Center for International Research on Photoelectric and Energy Materials,  
School of Materials and Energy, Yunnan University, Kunming 650091, P. R. China.*

<sup>†</sup> Corresponding author. Tel.: +86-871-65031567

Fax: +86-871-65031567

E-mail address: jqwang@ynu.edu.cn (J. Wang), jiangliang@ynu.edu.cn (L.Jiang)

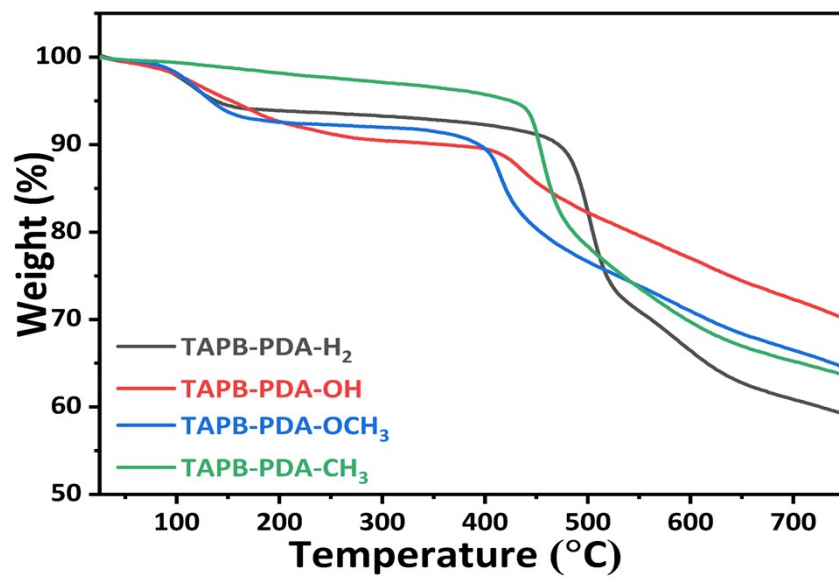

Fig. S1. TGA curve of TAPB-PDA-X

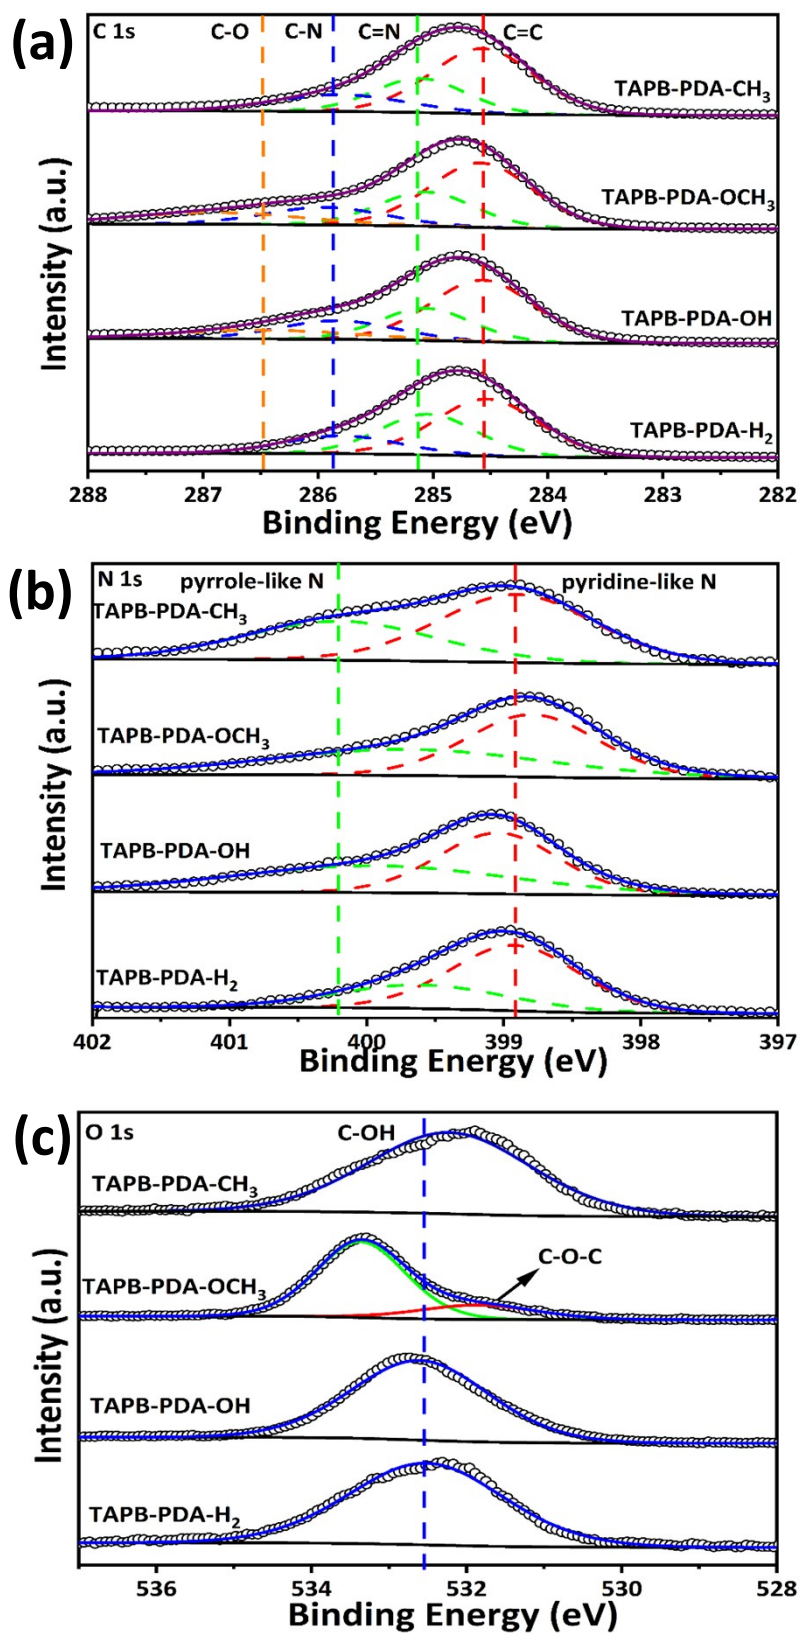

Fig. S2. (a) C 1s XPS spectra; (b) N 1s XPS; (c) O 1s XPS spectra of TAPB-PDA-X

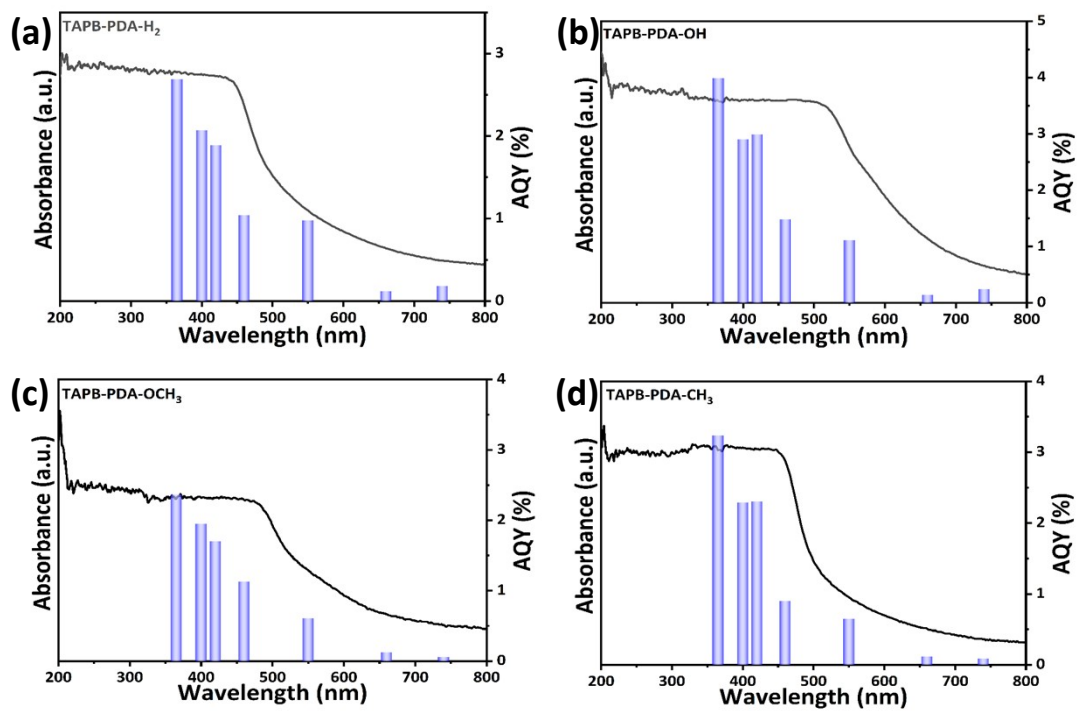

**Fig. S3.** AQY values of TAPB-PDA-X under different monochromatic light irradiation and UV-visible DRS spectra

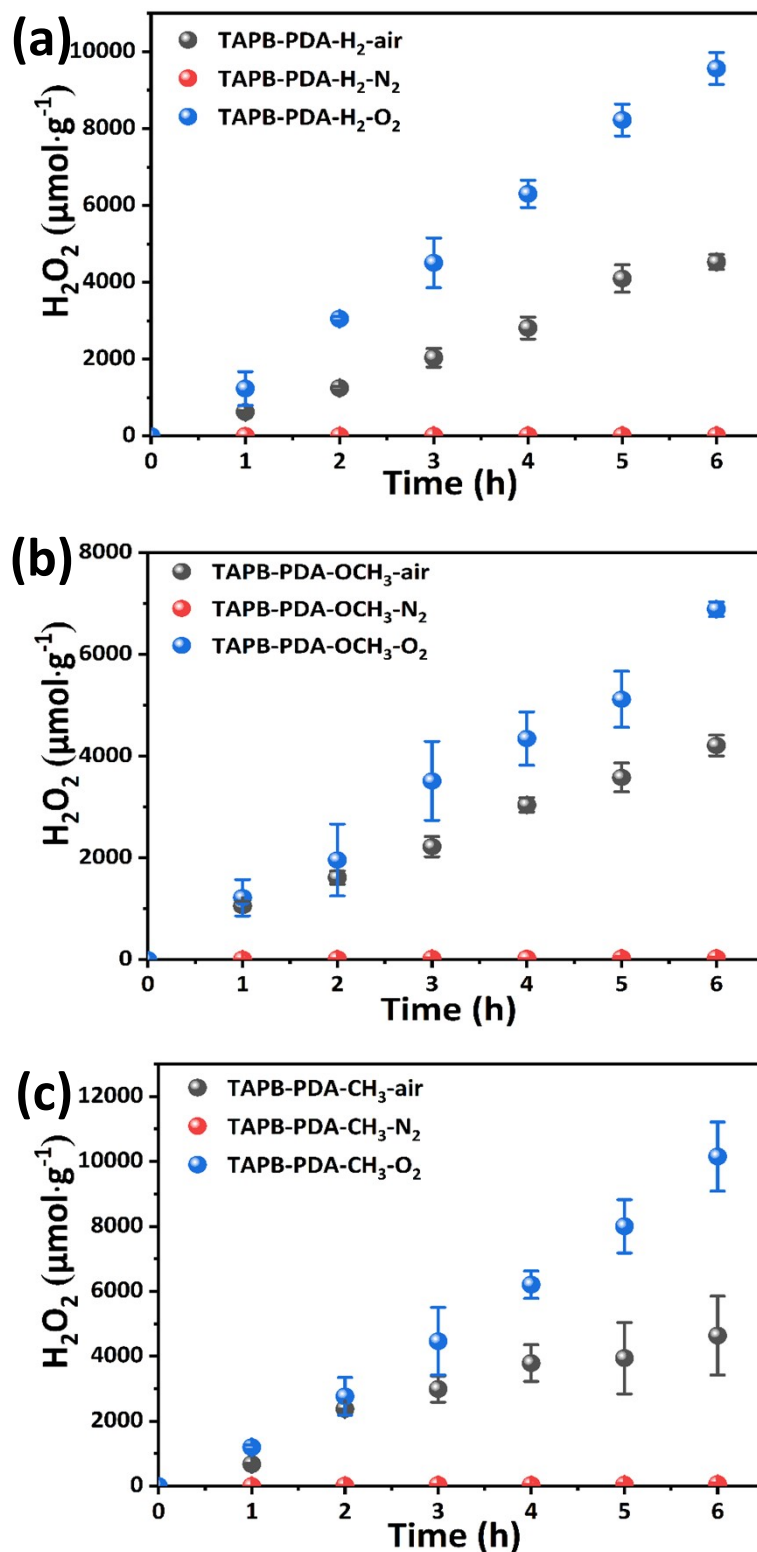

**Fig. S4.** Photocatalytic production of H<sub>2</sub>O<sub>2</sub> by (a) TAPB-PDA-H<sub>2</sub>, (b) TAPB-PDA-OCH<sub>3</sub> and (c) TAPB-PDA-CH<sub>3</sub> under different atmosphere conditions (Condition: 5 mg catalyst, 10 mL H<sub>2</sub>O/EtOH (v:v=9:1), LED light ( $\lambda > 420$  nm))

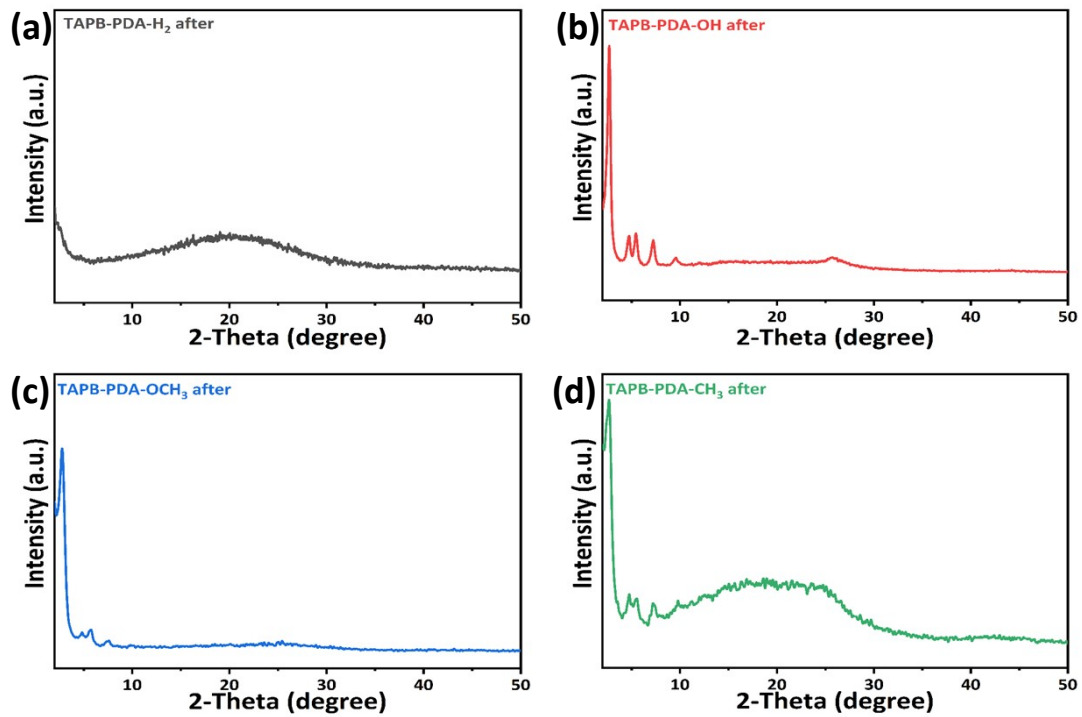

**Fig. S5.** XRD pattern of (a) TAPB-PDA-H<sub>2</sub>, (b) TAPB-PDA-OH, (c) TAPB-PDA-OCH<sub>3</sub> and (d) TAPB-PDA-CH<sub>3</sub> after photocatalytic reaction

**Table S1.** XPS analyses of C-OH bonding molar percentage

| Sample                    | C-OH bonding molar percentage (%) |
|---------------------------|-----------------------------------|
| TAPB-PDA-H <sub>2</sub>   | 4.38                              |
| TAPB-PDA-OH               | 10.39                             |
| TAPB-PDA-OCH <sub>3</sub> | 7.28                              |
| TAPB-PDA-CH <sub>3</sub>  | 6.46                              |

**Table S2.** Comparison of photocatalytic H<sub>2</sub>O<sub>2</sub> production with other COFs

| Samples                    | H <sub>2</sub> O <sub>2</sub>                                     | AQY (%)          | Solvent                         | Reference |
|----------------------------|-------------------------------------------------------------------|------------------|---------------------------------|-----------|
| TAPD-(Me) <sub>2</sub> COF | 234.52<br>( $\mu\text{mol}\cdot\text{g}^{-1}\cdot\text{h}^{-1}$ ) | -                | H <sub>2</sub> O:EtOH (1:9)     | 1         |
| CHF-DPDA                   | 256<br>( $\mu\text{mol}\cdot\text{g}^{-1}\cdot\text{h}^{-1}$ )    | 16.0<br>(420nm)  | H <sub>2</sub> O                | 2         |
| TPB-DMTP-COF               | 2882<br>( $\mu\text{mol}\cdot\text{g}^{-1}\cdot\text{h}^{-1}$ )   | -                | H <sub>2</sub> O                | 3         |
| CTF-NS-5BT                 | 1630<br>( $\mu\text{mol}\cdot\text{g}^{-1}\cdot\text{h}^{-1}$ )   | -                | H <sub>2</sub> O:BA<br>(9:1)    | 4         |
| COF-TfpBpy                 | 1970<br>( $\mu\text{mol}\cdot\text{L}^{-1}\cdot\text{h}^{-1}$ )   | 8.1<br>(420nm)   | H <sub>2</sub> O                | 5         |
| TpMa/CN-5                  | 880.46<br>( $\mu\text{mol}\cdot\text{L}^{-1}$ )                   | -                | H <sub>2</sub> O:IPA<br>(9:1)   | 6         |
| TF <sub>50</sub> -COF      | 1739<br>( $\mu\text{mol}\cdot\text{g}^{-1}\cdot\text{h}^{-1}$ )   | 5.1<br>(400 nm)  | H <sub>2</sub> O: EtOH<br>(9:1) | 7         |
| TAPB-PDA-H <sub>2</sub>    | 1545.3<br>( $\mu\text{mol}\cdot\text{g}^{-1}\cdot\text{h}^{-1}$ ) | 1.89<br>(420 nm) | H <sub>2</sub> O:EtOH (9:1)     | This work |
| TAPB-PDA-OH                | 2117.6<br>( $\mu\text{mol}\cdot\text{g}^{-1}\cdot\text{h}^{-1}$ ) | 2.99<br>(420 nm) | H <sub>2</sub> O:EtOH (9:1)     | This work |
| TAPB-PDA-OCH <sub>3</sub>  | 1148.2<br>( $\mu\text{mol}\cdot\text{g}^{-1}\cdot\text{h}^{-1}$ ) | 1.70<br>(420 nm) | H <sub>2</sub> O:EtOH (9:1)     | This work |
| TAPB-PDA-CH <sub>3</sub>   | 1691.6<br>( $\mu\text{mol}\cdot\text{g}^{-1}\cdot\text{h}^{-1}$ ) | 2.31<br>(420 nm) | H <sub>2</sub> O:EtOH (9:1)     | This work |
| TAPB-PDA-H <sub>2</sub>    | 1349.3<br>( $\mu\text{mol}\cdot\text{g}^{-1}\cdot\text{h}^{-1}$ ) | -                | H <sub>2</sub> O                | This work |
| TAPB-PDA-OH                | 1841.3<br>( $\mu\text{mol}\cdot\text{g}^{-1}\cdot\text{h}^{-1}$ ) | -                | H <sub>2</sub> O                | This work |



| Samples                   | H <sub>2</sub> O <sub>2</sub>                                    | AQY (%) | Solvent          | References |
|---------------------------|------------------------------------------------------------------|---------|------------------|------------|
| TAPB-PDA-OCH <sub>3</sub> | 869.1<br>( $\mu\text{mol}\cdot\text{g}^{-1}\cdot\text{h}^{-1}$ ) | -       | H <sub>2</sub> O | This work  |
| TAPB-PDA-CH <sub>3</sub>  | 857.8<br>( $\mu\text{mol}\cdot\text{g}^{-1}\cdot\text{h}^{-1}$ ) | -       | H <sub>2</sub> O | This work  |

## References:

1. C. Krishnaraj, H. Sekhar Jena, L. Bourda, A. Laemont, P. Pachfule, J. Roeser, C. V. Chandran, S. Borgmans, S. M. J. Rogge, K. Leus, C. V. Stevens, J. A. Martens, V. Van Speybroeck, E. Breynaert, A. Thomas and P. Van Der Voort, *J. Am. Chem. Soc.*, 2020, **142**, 20107-20116.
2. H. Cheng, H. Lv, J. Cheng, L. Wang, X. Wu and H. Xu, *Adv. Mater.*, 2021, **34**, e2107480.
3. L. Li, L. Xu, Z. Hu and J. C. Yu, *Adv. Funct. Mater.*, 2021, **31**, 2106120
4. X. Yu, B. Viengkeo, Q. He, X. Zhao, Q. Huang, P. Li, W. Huang and Y. Li, *Adv. Sustain. Syst.*, 2021, **5**, 2100184.
5. M. Kou, Y. Wang, Y. Xu, L. Ye, Y. Huang, B. Jia, H. Li, J. Ren, Y. Deng, J. Chen, Y. Zhou, K. Lei, L. Wang, W. Liu, H. Huang and T. Ma, *Angew. Chem. Int. Edit.*, 2022, **61**, e202200413.
6. H. Wang, E. Almatrafi, Z. Wang, Y. Yang, T. Xiong, H. Yu, H. Qin, H. Yang, Y. He, C. Zhou, G. Zeng and P. Xu, *J. Colloid. Interf. Sci.*, 2022, **608**, 1051-1063.
7. H. Wang, C. Yang, F. Chen, G. Zheng and Q. Han, *Angew. Chem. Int. Edit.*, 2022, **61**, e202202328
